# Supplementary material
Source: MDPI journal article supplement (https://www.mdpi.com/2312-7481/8/11/143)
Supplement: s1 [file s1]

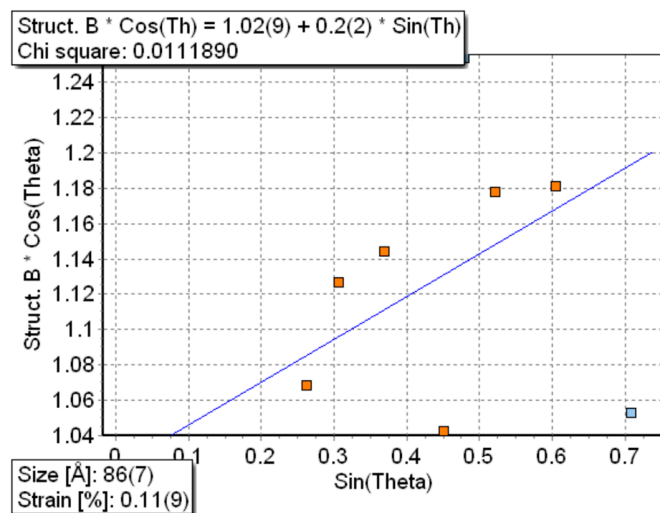

1-2- XRD analysis for RMNPs:

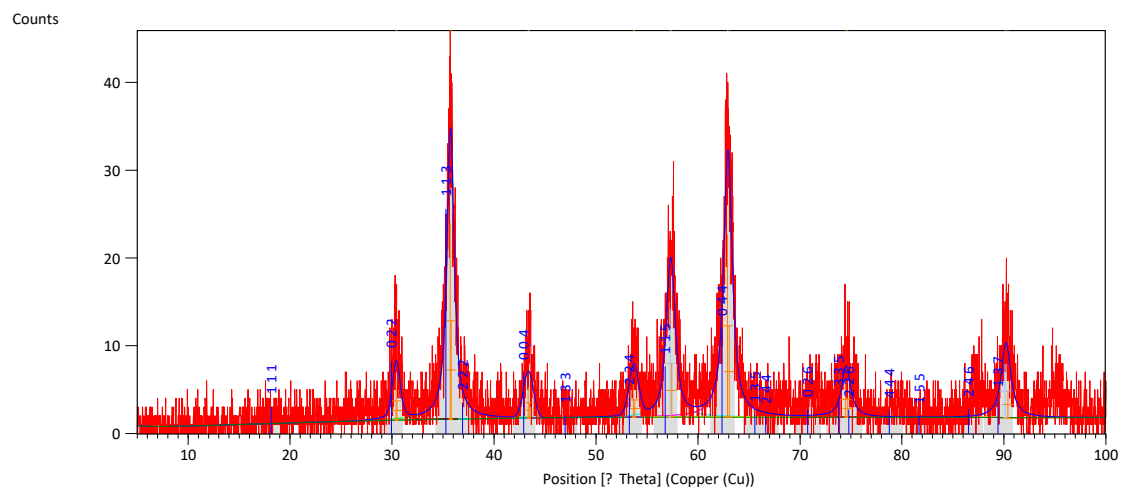

Size and strain:

Crystallite Size [nm] 5.9

Crystallite (rms) Strain [%] 0

1-3- XRD analysis for SiMNPs:

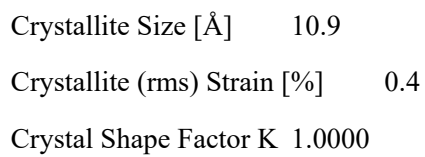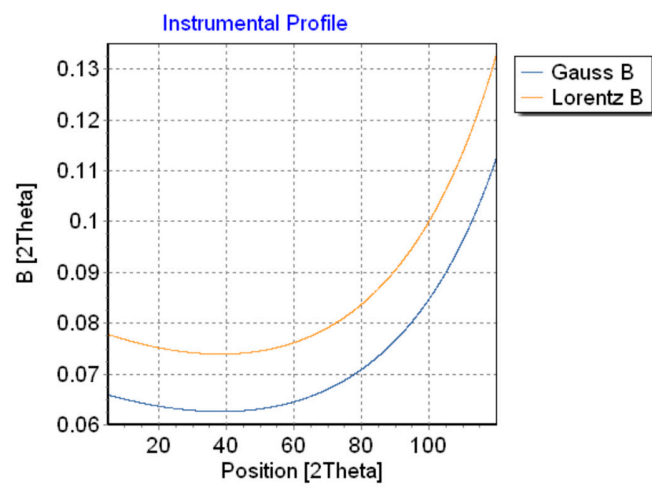

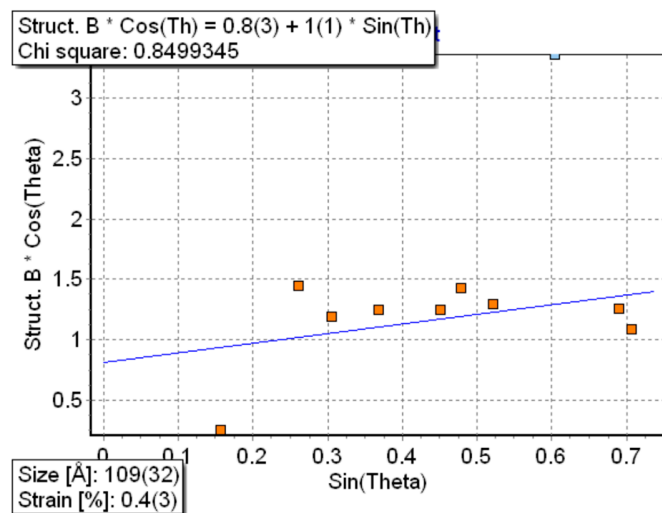

1-4- XRD analysis for A-RMNPs:

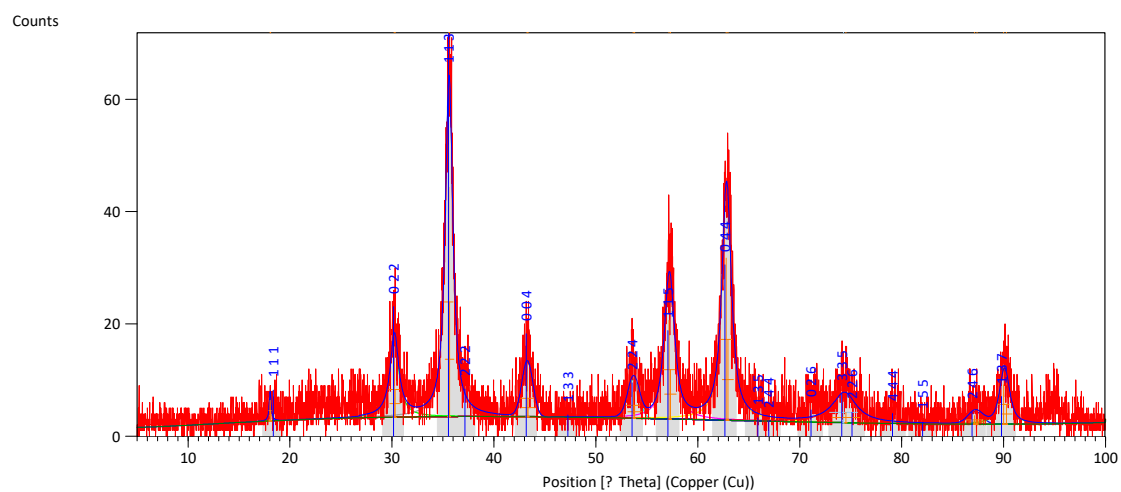

Crystallite Size [nm] 8

Crystallite (rms) Strain [%] 0.7



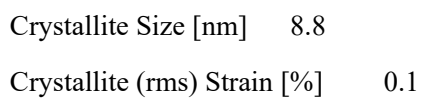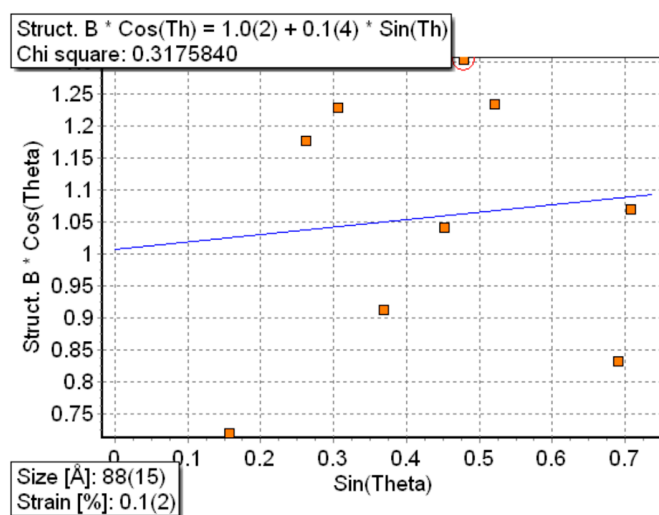

## 2- TEM analysis:

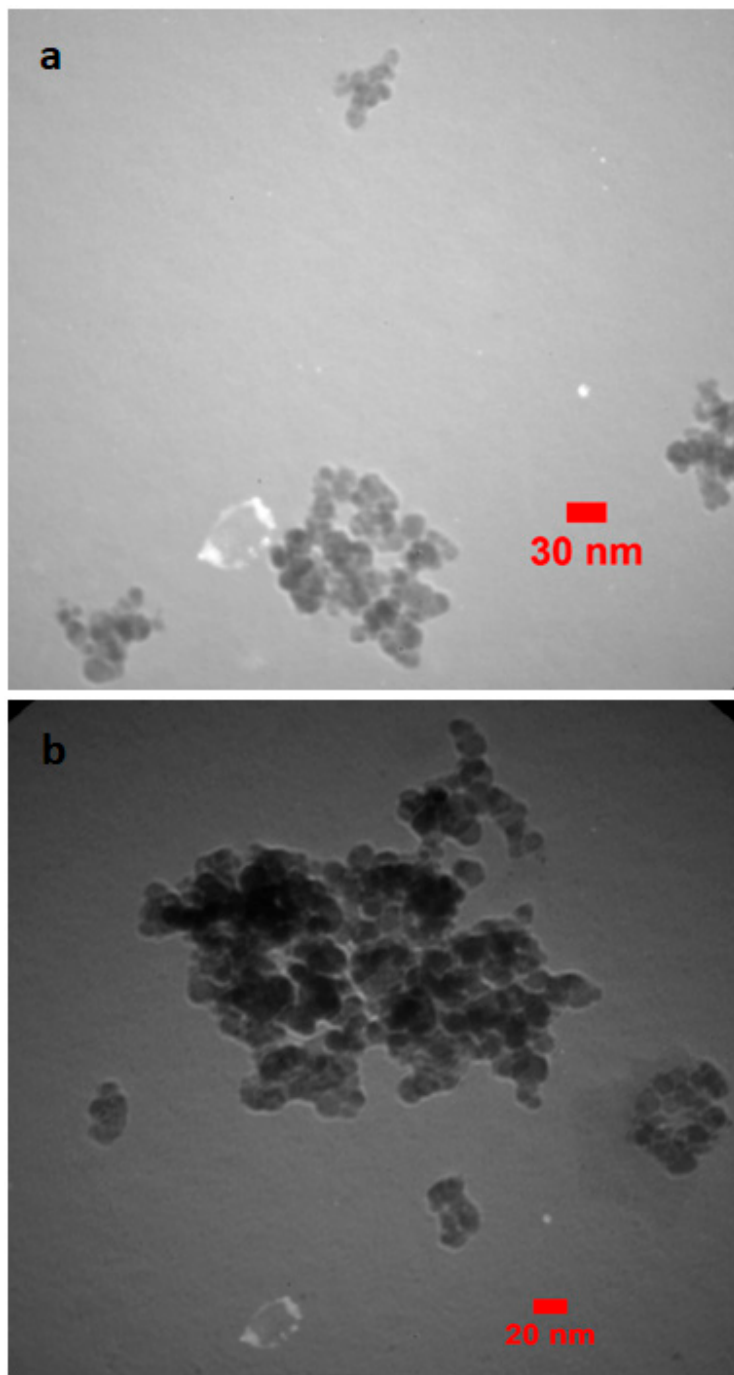

Figure S1. TEM images of a) Fe<sub>3</sub>O<sub>4</sub> NPs and b) alkylated Fe<sub>3</sub>O<sub>4</sub> NPs (A-MNPs)
